1     **Inference of the worldwide invasion routes of the pinewood nematode *Bursaphelenchus***  
2             ***xylophilus* using approximate Bayesian computation analysis**

3  
4  
5     Sophie Mallez<sup>1</sup>, Chantal Castagnone<sup>1</sup>, Eric Lombaert<sup>1</sup>, Philippe Castagnone-Sereno<sup>1</sup>, Thomas  
6             Guillemaud<sup>1</sup>

7  
8  
9     <sup>1</sup> INRAE, Université Côte d'Azur, CNRS, ISA, Sophia Antipolis, France

10  
11  
12  
13     **Corresponding Authors:**

14     Data analysis: [eric.lombaert@inrae.fr](mailto:eric.lombaert@inrae.fr)

15     Pinewood nematode biology: [philippe.castagnone@inrae.fr](mailto:philippe.castagnone@inrae.fr)

16  
17  
18  
19  
20     **ABSTRACT**

21  
22     Population genetics have been greatly beneficial to improve knowledge about biological invasions.  
23     Model-based genetic inference methods, such as approximate Bayesian computation (ABC), have  
24     brought this improvement to a higher level and are now essential tools to decipher the invasion  
25     routes of any invasive species. In this paper, we performed ABC analyses to shed light on the  
26     pinewood nematode (PWN) worldwide invasion routes and to identify the source of European  
27     populations. Originating from North America, this microscopic worm has been invading Asia since  
28     1905 and Europe since 1999, causing tremendous damage on pine forests. Using microsatellite data,  
29     we demonstrated the existence of multiple introduction events in Japan (one involving individuals  
30     originating from the USA and one involving individuals with an unknown origin) and China (one  
31     involving individuals originating from the USA and one involving individuals originating from Japan).  
32     We also found that Portuguese samples had an American origin. Although we observed some  
33     discrepancies between descriptive genetic methods and the ABC method, which are worth  
34     investigating and are discussed here, the ABC approach definitely helped clarify the worldwide  
35     history of the PWN invasion.

36  
37  
38  
39     **Keywords:** population genetics, genetic diversity, differentiation, spread, approximate Bayesian  
40     computation, PWN.

## 41 INTRODUCTION

42  
43 Biological invasions are recognized as one of the main threats to biodiversity (Walker & Steffen, 1997)  
44 and are fully integrated in global environmental changes induced by humans (Ricciardi, 2007; Sala et  
45 al., 2000; Vitousek, Dantonio, Loope, & Westbrooks, 1996; Wilcove, Rothstein, Dubow, Phillips, &  
46 Losos, 1998). Owing to their mainly irreversible aspect (Mooney & Cleland, 2001; but see Simberloff,  
47 2009, for examples of successful eradications) and as their number is growing, studying them  
48 constitutes huge challenges at ecological, economical, societal and scientific scales (Mack et al.,  
49 2000).

50 Understanding biological invasions necessitates identifying the history of the invasive process,  
51 including routes of invasion. The routes of invasion are defined as the pathways followed by  
52 organisms (individuals, seeds...) between their source populations and the invasive populations they  
53 formed in a new area. Their identification is a crucial step, whose accuracy is improved by the use of  
54 genetic data and analyses (Estoup & Guillemaud, 2010).

55 Several studies of many invasive species have shown the usefulness of genetic data and  
56 analyses to decipher the invasion routes (Boucher et al., 2013; Ciosi et al., 2008; Facon et al., 2003;  
57 Fontaine, Gladieux, Hood, & Giraud, 2013; Kelager, Pedersen, & Bruun, 2013; Papura et al., 2012;  
58 Perdereau et al., 2013; Rollins, Woolnough, Wilton, Sinclair, & Sherwin, 2009; Wan, Liu, & Zhang,  
59 2012). Recently, quantitative methods were proposed, among which the approximate Bayesian  
60 computation (ABC) method (Beaumont, Zhang, & Balding, 2002). ABC relies on the simulation of  
61 genetic data following different demographic scenarios defined by the user, and presents several  
62 advantages compared to descriptive methods, including (i) the statistical comparison of different  
63 invasion scenarios, (ii) the integration of historical and biological knowledge and (iii) the evaluation  
64 of the confidence in the scenario choice. In brief, various models supposed to explain the data are  
65 compared based on the similarity between summary statistics simulated from these models and from  
66 prior distributions of historical and genetic parameters on one hand and summary statistics computed  
67 from the actual samples on the other hand. This tool has helped reconstructing invasion histories of  
68 multiple species (Ascunce et al., 2011; Barres et al., 2012; Boissin et al., 2012; Fraimout et al., 2017;  
69 Guillemaud et al., 2015; Lombaert et al., 2010a; Miller et al., 2005; Pascual et al., 2007; Rius, Turon,  
70 Ordonez, & Pascual, 2012; Sherpa et al., 2019).

71 In this study, we were interested in the invasion of the pinewood nematode (PWN),  
72 *Bursaphelenchus xylophilus* (Steiner & Buhner, 1934; Nickle, 1970; Nematoda: Aphelenchoididae).  
73 The PWN is a microscopic worm, responsible for the pine wilt disease (Mamiya, 1972, 1976, 1983),  
74 which annually kills millions of pine trees worldwide (Mamiya, 1988; Soliman et al., 2012; Suzuki,  
75 2002; Vicente, Espada, Vieira, & Mota, 2011). The PWN is native to North America, namely Canada  
76 and the USA (Dropkin et al., 1981; Kiritani & Morimoto, 2004). The first invasive outbreak of the PWN  
77 was observed in Japan in 1905. The species was then observed in China in 1982, in Taiwan before  
78 1985 and in South Korea in 1988 (Futai, 2013; Mamiya, 1988; Moon, Cheon, & Lee, 2007). In 1999,  
79 the PWN was observed in Europe, first in Portugal, and then Madeira Island and Spain (Abelleira,  
80 Picoaga, Mansilla, & Aguin, 2011; Fonseca et al., 2012; Mota et al., 1999). To date, the origin of PWN  
81 European populations is still unclear. Some authors have proposed an Asian origin for European  
82 invasive populations of PWN (Figueiredo et al., 2013; Valadas, Barbosa, Espada, Oliveira, & Mota,  
83 2012). However, descriptive genetic methods based on genetic distances and clustering analyses  
84 recently failed to distinguish between an American and an Asian origin for European outbreaks  
85 (Mallez et al., 2015). Analyses based on  $F_{ST}$  values (Weir & Cockerham, 1984) and mean individual  
86 assignment likelihoods (Paetkau, Slade, Burden, & Estoup, 2004) suggested an American origin for all  
87 Portuguese samples, while analyses based on Cavalli-Sforza and Edwards' distances (Cavalli-Sforza &  
88 Edwards, 1967) and Bayesian clustering (Pritchard, Stephens, & Donnelly, 2000) suggested a Japanese  
89 origin for these samples. The aim of the present study was to use ABC to clarify the invasion history  
90 of the PWN by performing quantitative Bayesian statistical comparison of various competing invasion

91 scenarios, through the calculation of their posterior probabilities (Miller et al., 2005; Pascual et al.,  
92 2007).

93

94

## 95 MATERIAL & METHODS

96

### 97 *Sampling and genotyping*

98

99 In this study, 48 site samples, representing a total of 1080 individuals were analyzed: 28 site samples  
100 from the USA (554 individuals) representing the native area, and 7 site samples from Japan (210  
101 individuals), 9 from Portugal/Madeira (169 individuals) and 4 from China (147 individuals)  
102 representing the invaded areas. The features of the samples are listed in Table 1. All the individuals  
103 were extracted from wood samples collected directly in the field, using a sieve or the Baermann  
104 method (Viglierchio & Schmitt, 1983). The historical knowledge about the invasion of the PWN and  
105 its spread within each invaded area (Abelleira et al., 2011; Fonseca et al., 2012; Futai, 2013; Mamiya,  
106 1988; Moon et al., 2007; Mota et al., 1999) allowed us to associate a date of first observation to the  
107 different invasive outbreaks (Table 1).

108

109

110 **Table 1:** Characteristics and population genetics summary statistics of the 48 site samples of the  
111 pinewood nematode used in this study.

| Code  | Nb.<br>Individuals | Location                         | First<br>obs.<br>(years) | Mean<br>$N_a$ | $H_e$ | $H_o$ | $F_{IS}$ |
|-------|--------------------|----------------------------------|--------------------------|---------------|-------|-------|----------|
| MO1   | 31                 | USA - Missouri - Columbia        | -                        | 3.33          | 0.35  | 0.29  | 0.19*    |
| MO2   | 23                 | USA - Missouri - Columbia        | -                        | 3.53          | 0.38  | 0.28  | 0.27*    |
| NE1   | 16                 | USA - Nebraska - Davey           | -                        | 2.07          | 0.21  | 0.19  | 0.09     |
| NE2   | 15                 | USA - Nebraska - Davey           | -                        | 1.87          | 0.22  | 0.17  | 0.24     |
| NE5   | 14                 | USA - Nebraska - Pawnee Lake     | -                        | 2.00          | 0.22  | 0.19  | 0.14     |
| NE6   | 21                 | USA - Nebraska - Pawnee Lake     | -                        | 1.40          | 0.20  | 0.10  | 0.48*    |
| NE9   | 29                 | USA - Nebraska - Pawnee Lake     | -                        | 2.73          | 0.33  | 0.25  | 0.26*    |
| NE10  | 26                 | USA - Nebraska - Pawnee Lake     | -                        | 1.80          | 0.20  | 0.16  | 0.19*    |
| NE12  | 28                 | USA - Nebraska - Conestoga Lake  | -                        | 1.53          | 0.16  | 0.11  | 0.34*    |
| NE13b | 19                 | USA - Nebraska - Pioneers Park   | -                        | 2.40          | 0.30  | 0.21  | 0.31*    |
| NE14  | 28                 | USA - Nebraska - Pioneers Park   | -                        | 1.73          | 0.25  | 0.17  | 0.34*    |
| NE15  | 23                 | USA - Nebraska - Pioneers Park   | -                        | 2.27          | 0.23  | 0.14  | 0.39*    |
| NE19  | 16                 | USA - Nebraska - UNL East Campus | -                        | 1.87          | 0.25  | 0.21  | 0.15     |
| NE22  | 17                 | USA - Nebraska - Lincoln         | -                        | 2.07          | 0.30  | 0.22  | 0.28*    |
| NE23  | 25                 | USA - Nebraska - Lincoln         | -                        | 1.27          | 0.08  | 0.07  | 0.09     |
| NE24  | 19                 | USA - Nebraska - Lincoln         | -                        | 1.33          | 0.08  | 0.07  | 0.15     |
| VI9   | 22                 | USA - Virginia - Midlothian      | -                        | 1.53          | 0.15  | 0.16  | 0.14     |
| VI10  | 19                 | USA - Virginia - Virginia Beach  | -                        | 2.80          | 0.32  | 0.26  | 0.19     |
| MA1   | 19                 | USA - Massachusetts - Worcester  | -                        | 1.53          | 0.17  | 0.15  | 0.00     |
| NC1   | 12                 | USA - North Carolina             | -                        | 2.93          | 0.41  | 0.38  | 0.06     |
| NC2   | 23                 | USA - North Carolina             | -                        | 3.27          | 0.38  | 0.30  | 0.22*    |
| NY1   | 10                 | USA - New York                   | -                        | 2.40          | 0.37  | 0.20  | 0.47*    |
| GA1   | 7                  | USA - Georgia                    | -                        | 2.00          | 0.27  | 0.23  | 0.16     |
| GA2   | 20                 | USA - Georgia                    | -                        | 2.67          | 0.36  | 0.31  | 0.13*    |
| GA3   | 8                  | USA - Georgia                    | -                        | 2.80          | 0.39  | 0.28  | 0.31     |

|           |    |                                     |      |      |      |      |       |
|-----------|----|-------------------------------------|------|------|------|------|-------|
| GA4       | 15 | USA - Georgia                       | -    | 2.80 | 0.42 | 0.28 | 0.34* |
| KS1       | 17 | USA - Kansas                        | -    | 3.87 | 0.44 | 0.36 | 0.18* |
| Boylston  | 32 | USA - Mississippi - Boylston        | -    | 2.20 | 0.34 | 0.24 | 0.29* |
| Jap120    | 23 | Japan - Iwate - Shiwa               | 1978 | 1    | -    | -    | -     |
| Jap212    | 27 | Japan - Iwate - Shiwa               | 1978 | 1    | -    | -    | -     |
| Jap308    | 25 | Japan - Iwate - Shiwa               | 1978 | 1    | -    | -    | -     |
| Kasumig2  | 36 | Japan - Ibaraki - Kasumigaura       | 1971 | 1    | -    | -    | -     |
| Kasumig3  | 29 | Japan - Ibaraki - Kasumigaura       | 1971 | 1.20 | 0.07 | 0.07 | -0.02 |
| Kasumig5  | 35 | Japan - Ibaraki - Kasumigaura       | 1971 | 1    | -    | -    | -     |
| Kosa      | 35 | Japan - Kumamoto - Kosa             | 1905 | 1.27 | 0.06 | 0.06 | 0.03  |
| GuangDong | 41 | China - Guangdong                   | 1988 | 1    | -    | -    | -     |
| GuangXi   | 32 | China - GuangXi                     | -    | 1    | -    | -    | -     |
| Laoshan   | 39 | China - Shandong - Laoshan          | 1982 | 1    | -    | -    | -     |
| ShanDong  | 35 | China - Shandong                    | 1982 | 1    | -    | -    | -     |
| Mad23PC   | 12 | Madeira Island - Porto da Cruz      | 2008 | 1    | -    | -    | -     |
| Mad24C    | 7  | Madeira Island - Calheta            | 2008 | 1    | -    | -    | -     |
| 128S      | 17 | Portugal - Setubal - Grândola       | 1999 | 1.07 | 0.03 | 0.01 | 0.62* |
| TR1       | 30 | Portugal - Setubal - Troia          | 1999 | 1    | -    | -    | -     |
| TR2       | 27 | Portugal - Setubal - Troia          | 1999 | 1    | -    | -    | -     |
| AM2       | 21 | Portugal - Setubal - Aguas de Moura | 1999 | 1    | -    | -    | -     |
| Comporta  | 28 | Portugal - Setubal - Comporta       | 1999 | 1    | -    | -    | -     |
| E182      | 13 | Portugal - Coimbra - Penela         | 2008 | 1    | -    | -    | -     |
| E1069     | 14 | Portugal - Viseu - Castro Daire     | 2008 | 1    | -    | -    | -     |

112 **Note:** Mean  $N_a$ , mean number of alleles per sample;  $H_e$ , expected heterozygosity and  $H_o$ , observed  
113 heterozygosity.  $F_{IS}$  was calculated as described by Weir & Cockerham (1984). “\*” indicates that the  
114 result of the HWE test was significant at the 5% level after correction for multiple comparison. “-”  
115 indicates that  $H_e$ ,  $H_o$  and  $F_{IS}$  were not computed for monomorphic samples on one hand and that the  
116 date of first observation was unknown or not applicable on the other hand.

117

118

119 The DNA extraction of each single individual was carried out by thermal shock (Castagnone,  
120 Abad, & Castagnone-Sereno, 2005) and 16 microsatellite loci were then amplified as described by  
121 Mallez *et al.* (2015; 2013). The locus M26 was excluded due to a lack of amplification for one Chinese  
122 site sample. The analyses presented here were thus conducted with 15 microsatellite loci.

123

#### 124 *Descriptive genetic analyses*

125

126 For each site sample, we computed the mean number of alleles (Mean  $N_a$ ) and the observed ( $H_o$ )  
127 and expected ( $H_e$ ) heterozygosities per site sample with Genetix version 4.05 (Belkhir, Borsa, Chikhi,  
128 Raufaste, & Bonhomme, 1996-2004). We tested each site sample for a deviation from Hardy-  
129 Weinberg equilibrium (HWE) with Genepop version 4.1.3 (Rousset, 2008) and we quantified the  
130 inferred deviations to HWE by computing the  $F_{IS}$  estimate of Weir and Cockerham (1984) with Fstat  
131 version 2.9.3.2 (Goudet, 2002). Linkage disequilibria (LD) between all pairs of loci were also tested  
132 with Genepop (Rousset, 2008). The significance level of multiple tests of HWE and LD were adjusted  
133 by applying the false discovery rate (Benjamini & Hochberg, 1995) and sequential Bonferroni (Sokal  
134 & Rohlf, 1995) corrections, respectively.

135

#### 136 *Evolutionary relationships between the different site samples*

137

138 We used descriptive genetic methods to (i) determine the level of genetic structure existing in each  
139 area under study, (ii) reduce the data and select some site samples to include in the ABC analyses  
140 (see below) and (iii) guide the choice of the invasive scenarios to compare in these latter analyses.

141 First, we evaluated the level of genetic differentiation between all site sample pairs with  
142 Genepop (Rousset, 2008). Non independent multiple testing implied to adjust the significance level  
143 with the sequential Bonferroni method (Sokal & Rohlf, 1995).  $F_{ST}$  (Weir & Cockerham, 1984),  
144 corrected for null alleles (observed for some of the site samples and loci, see Mallez et al., 2015) and  
145  $D_{EST}$  of Jost (2008) between pairs of site samples were computed with FreeNA (Chapuis & Estoup,  
146 2007) and SMOGD (Crawford, 2010), respectively.

147 Second, we performed Bayesian clustering analyses within each geographical area with  
148 Structure version 2.3 (Pritchard, Stephens, & Donnelly, 2000). These analyses were carried out only  
149 for samples within the USA and China given that the other areas (i. e., Japan and Portugal) had been  
150 analyzed previously (Mallez et al., 2015). We used the admixture model with correlated allele  
151 frequencies. The number of clusters,  $K$ , varied from 1 to the total number of site samples per area,  
152 i.e., 18 for the USA and 4 for China. Twenty independent runs per  $K$  were carried out with  $10^6$  MCMC  
153 iterations each, following a burn-in period of  $2 \times 10^5$  iterations. For each Structure analysis, the  
154 Clumpak server (Kopelman, Mayzel, Jakobsson, Rosenberg, & Mayrose, 2015), which combines the  
155 Clumpp (Jakobsson & Rosenberg, 2007) and Distruct softwares (Rosenberg, 2004), was used to  
156 postprocess the Structure outputs, i.e., (i) to determine the highest level of genetic structure using  
157 the  $\Delta K$  of Evanno (2005) and (ii) to identify the most frequent clustering pattern for each value of  $K$   
158 (across the 20 independent runs) and to display the corresponding bar plots.

159 Third, the Structure software was also run with all site samples from all areas as previously  
160 described with  $K$  varying from 1 to 10 (which appeared to be high enough to capture the genetic  
161 pattern existing between the native and the invaded areas, see Results). For this Structure analysis,  
162 the Clumpak server (Kopelman et al., 2015) was also used to postprocess the Structure outputs as  
163 presented above. Examination of Structure results allowed us to propose putative historical  
164 relationships existing between the different site samples.

165 Finally, a neighbor-joining tree based on Cavalli-Sforza & Edwards' distances (Cavalli-Sforza &  
166 Edwards, 1967), corrected for null alleles with FreeNA (Chapuis & Estoup, 2007) was plotted and the  
167 mean individual assignment likelihoods (denoted  $L_{i \rightarrow s}$ , Paetkau, Slade, Burden, & Estoup, 2004) of  
168 each invasive site sample  $i$  to each putative source sample  $s$  were computed with GeneClass2 version  
169 2.0 (Piry et al., 2004).

## 170 171 *ABC analyses*

172  
173 All ABC model-choice analyses were performed with DIYABC version 2.1.0 (Cornuet et al., 2014). To  
174 define the scenarios to compare, we took into account the historical knowledge (i.e., dates of first  
175 observation), results from this study and previous analyses (Mallez et al., 2015). Particular site  
176 samples representing genetic units inferred from Structure analyses were used for the ABC analyses.  
177 As proposed by Lombaert *et al.* (2014), we performed a step-by-step ABC analysis: we first tried to  
178 clarify the Asian invasion history (i.e., the oldest invasive area) and then integrated Europe (i.e., the  
179 most recent invasive area) into the scenarios. Thus, we first focused on establishing the number of  
180 introduction events in Japan and in China, independently (Figures S1 and S2 for a representation of  
181 the competing scenarios in each analysis). Then, we studied the relationships between Japan and  
182 China (Figures S3 and S4 for a representation of the competing scenarios in each analysis). Finally, we  
183 integrated the Portuguese site samples into the inferred Asian invasion scenario to determine their  
184 origin among the three possible sources: USA, Japan and China (see Figure 1 for a representation of  
185 the competing scenarios in this analysis).

186



187 **Figure 1: Competing scenarios in the ABC analyses performed to investigate the origin of the**  
 188 **pinewood nematode invasion in Portugal.** Native stands for the native area, represented by the  
 189 sample NE2. Japan1 stands for the Japanese genetic unit 1, represented by the sample Kosa. Japan2  
 190 stands for the Japanese genetic unit 2, represented by the sample Kasumig3. China1 stands for the  
 191 Chinese genetic unit 1, represented by the sample Laoshan. China2 stands for the Chinese genetic  
 192 unit 2, represented by the sample Guangdong. Portugal stands for the Portuguese genetic unit,  
 193 represented by the sample TR1. The different colors represent different effective population sizes.  
 194 See Table S1 and Results for details.

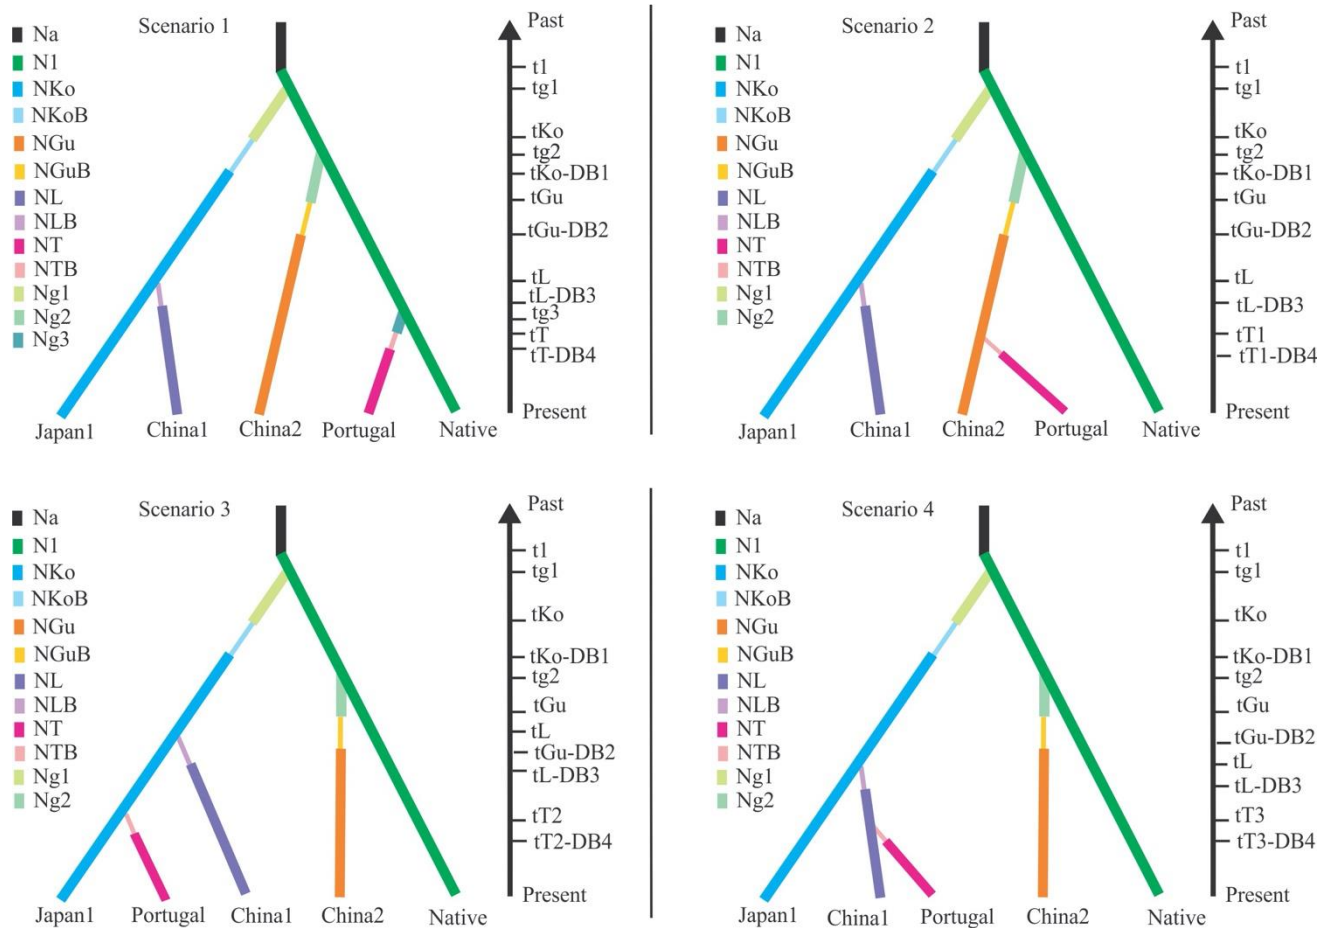

195 For each ABC analysis, we simulated one million datasets per competing scenario. To reduce  
 196 the datasets, the following summary statistics (SuSts) were used: the mean number of alleles, the  
 197 mean expected heterozygosity and the mean allelic size variance per population and pairs of  
 198 populations, the ratio of the number of alleles on the allelic size range (Garza & Williamson, 2001),  
 199 the mean individual assignment likelihoods of population  $i$  to population  $j$  (Pascual et al., 2007) and  
 200 the shared allele distances between populations (Chakraborty & Jin, 1993). Posterior probabilities  
 201 were estimated using a polychotomous logistic regression on the 1% of simulated datasets closest to  
 202 the observed dataset (Cornuet, Ravigne, & Estoup, 2010; J. M. Cornuet et al., 2008). The LDA option,  
 203 allowing to perform a discriminant analysis on the SuSts before the regression, was used (Cornuet  
 204 et al., 2014; Estoup et al., 2012) to gain in computation time.

205 To evaluate the robustness of our inferences, we performed the ABC analyses with two  
 206 different sets of prior distributions (referred to as prior set 1 and prior set 2 in the Results). The  
 207 generation time of the PWN *in natura* is not well-known due to a lack of direct observations of the  
 208 PWN inside the tree. Consequently, we tested the effect of choosing various generation times (15, 30  
 209 and 45 generations per year, Table S1). Thirty generations per year being the most realistic,  
 210 considering that the PWN reproduces from June to September and estimating an average summer  
 211 temperature of 25°C where it is currently distributed. We also tested the effect of choosing different  
 212  
 213  
 214

215 samples from the native area (NE5, NE9, NE22), which are the closest genetically to NE2, the native  
216 sample selected based on descriptive genetic analyses (see below). Then, we verified the non-  
217 overlapping of the 95 % confidence intervals of the posterior probabilities of scenarios within each  
218 ABC analysis. We calculated the posterior error rate by performing ABC analyses on 1,000 simulated  
219 pseudo-observed datasets. These datasets were simulated by drawing with replacement the scenario  
220 identity and the parameter values among the 500 sets of scenarios and parameters values that  
221 generated simulated datasets closest to the observed dataset. The posterior error rate corresponds  
222 to the proportion of ABC analyses that wrongly identified scenarios and thus informs us on our ability  
223 to select the true scenario. Finally, we checked the adequacy between the observed dataset and the  
224 selected scenario, i.e., the capacity of this scenario to generate datasets similar to the observed one.  
225 Basically, 1,000 new datasets were simulated by drawing the parameter values from the posterior  
226 distributions of the selected scenario. Then, each observed SuSt was confronted to the distribution  
227 formed by the SuSts obtained from the new simulated datasets, which gave a rejection probability  
228 for each observed SuSt. A large number of probabilities being obtained, we adjusted the significance  
229 threshold with the false discovery rate method (Benjamini & Hochberg, 1995). For this purpose, two  
230 new SuSts were added to the ones used in ABC analyses: the  $F_{ST}$  (Weir & Cockerham, 1984) and the  
231  $d\mu^2$  distance (Goldstein, Linares, Cavalli-sforza, & Feldman, 1995) between pairs of populations.

232 In addition, as a complementary test, we performed an alternative analysis for each of the  
233 scenario comparisons described above using the recent DIYABC Random Forest v1.0 program (Collin  
234 et al. 2020). This program implements in the context of ABC a supervised machine-learning algorithm  
235 called the Random Forest (Breiman, 2001). Briefly, this non-parametric classification method uses  
236 hundreds of bootstrapped decision trees (creating the so-called forest) to perform classification using  
237 a set of predictor variables, here the summary statistics. Random Forest is able to learn from a smaller  
238 reference table, and it is more robust than polychotomous logistic regression to the choice and  
239 number of summary statistics (Pudlo et al. 2016). As a consequence, (i) we simulated 20,000 datasets  
240 per competing scenario, and (ii) we used all summary statistics described above, to which we added  
241 the  $F_{ST}$  (Weir & Cockerham, 1984) and the  $d\mu^2$  distance (Goldstein, Linares, Cavalli-sforza, & Feldman,  
242 1995) between pairs of populations, the maximum likelihood estimate of admixture proportion for  
243 each trio of populations (Choisy et al. 2004) and the axes obtained from a linear discriminant  
244 analysis on summary statistics (Estoup et al. 2012). We then grew a classification forest of 1,000  
245 trees based on all simulated datasets. The random forest computation applied to the observed  
246 dataset provides a classification vote representing the number of times a model is selected among  
247 the 1000 trees. The scenario with the highest classification vote was selected as the most likely  
248 scenario. We then estimated its posterior probability by way of a second random forest procedure of  
249 1,000 trees as described by Pudlo et al. (2016). To evaluate the global performance of our ABC  
250 Random Forest scenario choice, we computed the prior error rate based on the available out-of-bag  
251 simulations (i.e. simulations that are not used in tree building at each bootstrap).

252

253

254

255

## 256 RESULTS

257

### 258 *Descriptive genetic analyses*

259

260 The genetic features of the site samples are shown in Table 1. The American site samples displayed a  
261 genetic diversity low to moderate with mean  $N_a$  ranging from 1.27 to 3.87 and  $H_e$  from 0.08 to 0.44.  
262 More than half of the site samples were not at HWE and significant LD were observed for 13 tests out  
263 of the 1,084 realized, after correction. This may be due to the presence of null alleles, as already  
264 observed by Mallez *et al.* (2015).

265 All site samples from the invaded areas exhibited very low levels of genetic diversity owing to  
266 the presence of numerous monomorphic loci: 9 for Japan, 10 for China and 14 for Portugal/Madeira  
267 out of the 15 loci under study. In Japan, three site samples (Jap212, Jap308 and Jap120) appeared  
268 completely undifferentiated, with all the individuals sharing the same multi-locus genotype. In  
269 Portugal/Madeira, 162 individuals out of the 169 analyzed had the same multi-locus genotype and  
270 only one site sample, 128S, was different from the others. In China, all loci were monomorphic within  
271 site samples and three site samples out of the four studied presented the same multi-locus genotype  
272 for all their individuals.

273

#### 274 *Relationships between site samples within geographical areas*

275

276 The analysis of the American site samples led to the general observation of a strong genetic structure  
277 among PWN populations in USA, in good agreement with data from a previous sampling in the same  
278 area (Mallez et al., 2015). Indeed, almost all the American site samples appeared significantly  
279 differentiated after correction for multiple tests (Fisher method of probability combination on loci,  $p$   
280  $< 10^{-2}$ ). Only one test, between NC2 and GA3, was not significant (Fisher method,  $p = 0.11$ ).  $F_{ST}$ ,  
281 corrected for null alleles, reached high values and ranged from 0.036 to 0.76 (Table S2) and  $D_{EST}$   
282 ranged from 0.0041 to 0.329 (Table S2). This strong genetic differentiation pattern was supported by  
283 the Structure analysis, which revealed biological relevant clustering of individuals within site samples  
284 for high values of  $K$ , although the  $\Delta K$  inferred  $K = 2$  as the main structure (Figure S5). Different  
285 clustering patterns were identified with Clumpp, but they exhibited similar results, i.e., a strong  
286 genetic structure (Figure S5). In Japan, all site samples were also significantly differentiated, except  
287 the three undifferentiated ones mentioned above (Fisher method,  $p < 10^{-5}$ ) with  $F_{ST}$  corrected for null  
288 alleles ranging from 0.627 to 0.995 and  $D_{EST}$  ranging from 0.0042 to 0.0938 (Table S2). In China, all  
289 site samples were undifferentiated except Guangdong that appeared significantly differentiated from  
290 the others (Fisher method,  $p < 10^{-5}$ ) with a high mean corrected  $F_{ST}$  equal to 0.997 and a lower mean  
291  $D_{EST}$  equal to 0.106 (Table S2). This result was confirmed by the Bayesian clustering analysis, which  
292 inferred a relevant clustering of individuals for  $K = 2$ , Guangdong being pulled apart from the others  
293 Chinese site samples (Figure S6). In Portugal/Madeira, all site samples were undifferentiated except  
294 the site sample 128S, that was significantly different from the others (Fisher method,  $p < 10^{-5}$ ) with a  
295 mean corrected  $F_{ST}$  equal to 0.341 and a mean  $D_{EST}$  equal to 0.0005 (Table S2). In view of the presence  
296 of undifferentiated site samples within Japan, China and Portugal/Madeira, only one of these site  
297 samples was conserved in each invaded area for simplification. The conserved site samples were the  
298 following: Jap212, Laoshan, TR1 and Mad23PC for Japan, China, Portugal and Madeira, respectively.

299

#### 300 *Relationships between site samples among geographical areas*

301

302 All the site samples from different invaded areas appeared significantly differentiated between them  
303 and from the American site samples (Fisher method,  $p < 10^{-5}$ ). NE2 was the American site sample with  
304 the lowest differentiation from site samples from invaded areas based on the  $D_{EST}$  (mean value =  
305 0.034). Another American site sample, NE9, was selected based on the corrected  $F_{ST}$  (mean value =  
306 0.469), NE2 being the second lowest one with this measure (mean value = 0.541). The neighbor-  
307 joining tree confirmed that the site sample NE2 is the closest site sample to all site samples from the  
308 invaded areas and that the Portuguese site samples are closer to a Japanese site sample than a  
309 Chinese or an American site samples (Figure 2).

310



311 **Figure 2: Neighbor-Joining tree built with all the pinewood nematode samples used in this study.**  
312 Tree based on Cavalli-Sforza and Edwards distances (Cavalli-Sforza and Edwards 1967), corrected for  
313 null alleles (Chapuis and Estoup, 2007). The American samples were highlighted in orange, the  
314 Japanese samples in green, the Chinese samples in purple and the Portuguese samples in blue.

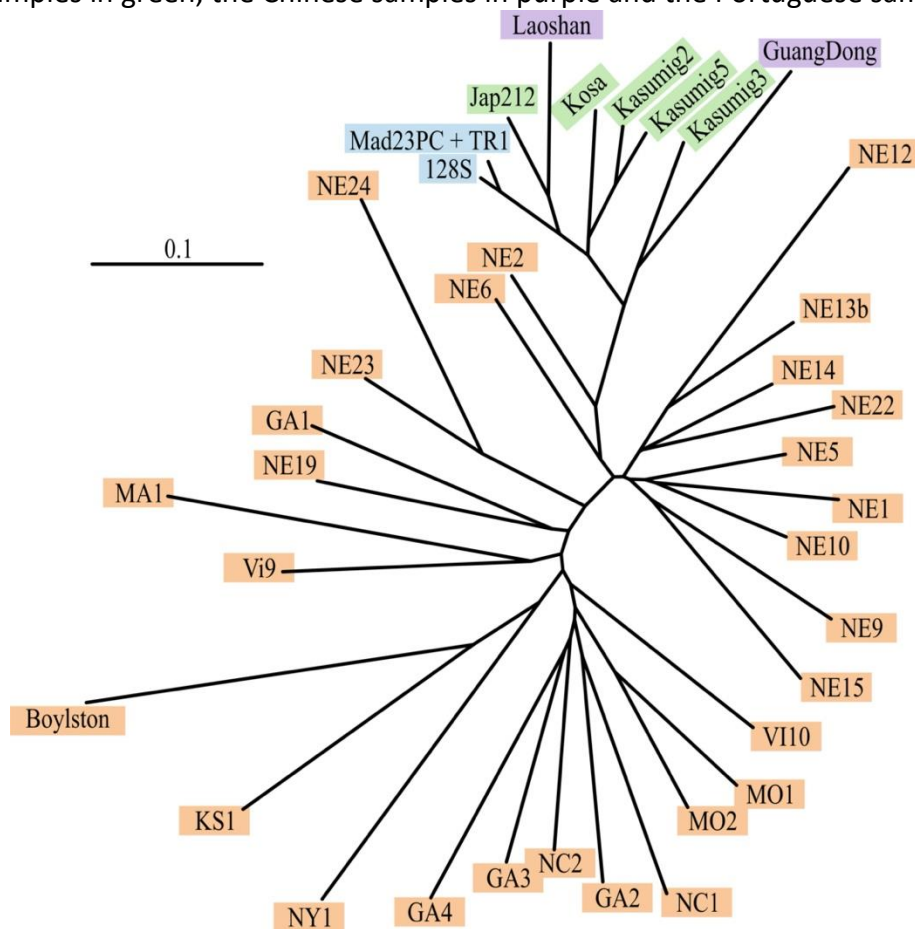

315  
316  
317  
318 For the Bayesian clustering analysis, the  $\Delta K$  inferred  $K=2$  as the main structure (Figure S7A), in which  
319 all the invasive site samples pulled apart from the native American site samples (Figure 3). From  $K=3$ ,  
320 different clustering patterns were observed (Figures 3 and S7B), in congruence with the sub-structure  
321 existing within each of the invaded and native areas. However, from  $K=8$ , the clustering pattern  
322 obtained within the invasive area appeared consistent between runs and identified four groups: one  
323 group with Mad23PC, 128S, TR1, Jap212 and Laoshan; another one with Kasumig2, Kasumig5 and  
324 Kosa; and Kasumig3 and Guangdong, that clustered separately from one another (Figure 3). Finally,  
325 almost all the site samples from the invaded areas were assigned to NE2 with the highest mean  
326 individual assignment likelihood (Figure S8). Only Guangdong and Laoshan were assigned to different  
327 samples, NE5 and Kosa, respectively (Figure S8).  
328

329 **Figure 3: Genetic structure of the pinewood nematode samples used in this study.** Bar plots of the  
330 coefficients of co-ancestry obtained in STRUCTURE analyses with several values of  $K$ . Each bar  
331 corresponds to one individual nematode and each cluster is represented with a particular color. The  
332 major clustering patterns are shown (see Figure S7B for the minor ones, when applicable).

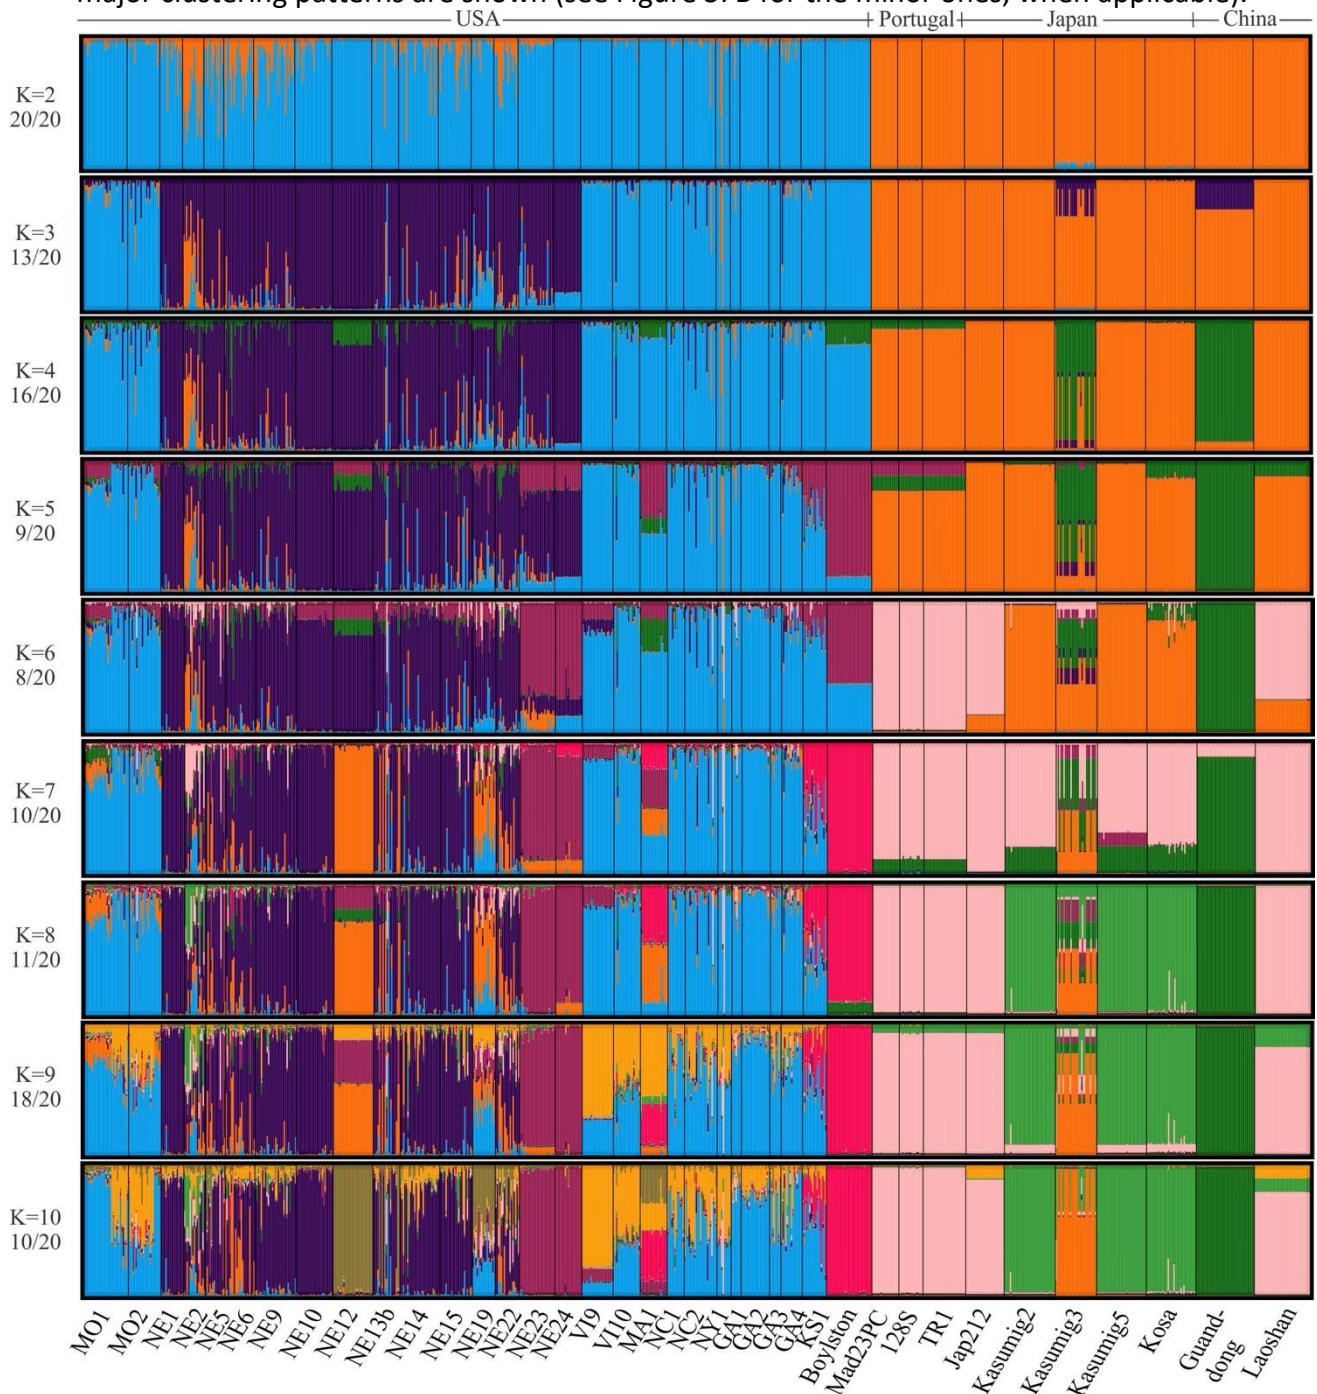

333  
334  
335 Summarizing and considering the results presented above, the site sample NE2 was the closest  
336 site sample of the native area to all invasive site samples but Guangdong. Thus, it was used to  
337 represent the native area in the competing scenarios of the ABC analyses. In view of the incomplete  
338 sampling of the native area (no sample from Canada was obtained) and the strong genetic  
339 structuration observed in the USA, it is unlikely that NE2 is a sample of the true source population.  
340 An unsampled “ghost” population diverging from NE2 was thus included in all scenarios (see Figures  
341 1, S1, S2, S3, S4 and Table S1). We also considered the following relevant genetic units to characterize  
342 the invaded areas in the following ABC analyses:  
343 - Japanese genetic unit 1, hereafter called Japan1, represented by Kosa, the closest sample to the  
344 introduction point in Japan and considered coming from the native area (Japan being the first  
345 known outbreak area of the PWN);

- 346 - Japanese genetic unit 2, hereafter called Japan2, represented by Kasumig3;  
 347 - Chinese genetic unit 1, hereafter called China1, represented by Laoshan;  
 348 - Chinese genetic unit 2, hereafter called China2, represented by Guangdong;  
 349 - Portuguese genetic unit, hereafter called Portugal, represented by TR1.

350

351 *ABC analyses*

352

353 In Japan, the results clearly indicated that a multiple introduction scenario is more likely than a single  
 354 introduction scenario with posterior probabilities over 0.95 for prior sets 1 and 2 and non-overlapping  
 355 confidence intervals, Japan2 being thus independent from Japan1 (Table 2). A similar result was  
 356 observed in China: China1 was independent from China2 with posterior probabilities of 0.94 and 0.70  
 357 for prior sets 1 and 2 respectively and non-overlapping confidence intervals, suggesting two  
 358 introduction events in China (Table 2). The ABC analyses carried out between site samples from Japan  
 359 and China revealed that: (i) Japan1 was probably the source of China1 and (ii) China2 is independent  
 360 from Japan1 (high posterior probabilities, results robust to prior set changes, Table 2). The analysis  
 361 between China2 and Japan2 gave inconsistent results, relative to the prior set used (Table 2). With  
 362 the prior set 1, the scenario describing an admixture event was selected but the posterior probability  
 363 was low, and a high posterior error rate was observed (Table 2). On the contrary, with the prior set  
 364 2, the scenario describing two independent events of introduction was selected with once again a  
 365 low posterior probability and a high posterior error rate value (Table 2). Consequently, the origin of  
 366 Japan2 remains unclear.

367

368

369 **Table 2:** Results of the ABC analyses carried out to infer the history of the pinewood  
 370 nematode invasion in Asia. Posterior probabilities and their 95% confidence intervals  
 371 (CI) were obtained using a polychotomous logistic regression (J. M. Cornuet et al.,  
 372 2010; J. M. Cornuet et al., 2008) and the LDA option (J. M. Cornuet et al., 2014;  
 373 Arnaud Estoup et al., 2012). The selected scenario in each analysis is shown in bold.

| Analysis and scenario                    | Posterior probability [95% CI] | PER   |
|------------------------------------------|--------------------------------|-------|
| <b>Analysis - Japan</b>                  |                                |       |
| <b>Prior set 1 - 30 generations/year</b> |                                |       |
| Native → Japan1 ; Native → Japan2        | <b>0.965 [0.962 ; 0.968]</b>   | 0.117 |
| Native → Japan1 → Japan2                 | 0.035 [0.032 ; 0.038]          |       |
| <b>Prior set 2 - 30 generations/year</b> |                                |       |
| Native → Japan1 ; Native → Japan2        | <b>0.985 [0.983 ; 0.987]</b>   | 0.106 |
| Native → Japan1 → Japan2                 | 0.015 [0.013 ; 0.017]          |       |
| <b>Analysis - China</b>                  |                                |       |
| <b>Prior set 1 - 30 generations/year</b> |                                |       |
| Native → China1 ; Native → China2        | <b>0.932 [0.928 ; 0.935]</b>   | 0.163 |
| Native → China1 → China2                 | 0.018 [0.017 ; 0.020]          |       |
| Native → China2 → China1                 | 0.050 [0.048 ; 0.053]          |       |
| <b>Prior set 2 - 30 generations/year</b> |                                |       |
| Native → China1 ; Native → China2        | <b>0.696 [0.686 ; 0.706]</b>   | 0.277 |
| Native → China1 → China2                 | 0.088 [0.082 ; 0.093]          |       |
| Native → China2 → China1                 | 0.216 [0.207 ; 0.225]          |       |
| <b>Analysis - China/Japan</b>            |                                |       |
| <b>Prior set 1 - 30 generations/year</b> |                                |       |
| Native → Japan1 ; Native → China1        | 0.256 [0.246 ; 0.265]          | 0.100 |
| Native → Japan1 → China1                 | <b>0.744 [0.735 ; 0.754]</b>   |       |
| Native → Japan1 ; Native → China2        | <b>0.827 [0.818 ; 0.836]</b>   | 0.092 |
| Native → Japan1 → China2                 | 0.173 [0.164 ; 0.182]          |       |
| Native → Japan2 ; Native → China2        | 0.342 [0.334 ; 0.350]          | 0.469 |
| Native → Japan2 → China2                 | 0.170 [0.164 ; 0.176]          |       |
| Native → China2 → Japan2                 | 0.079 [0.074 ; 0.086]          |       |
| Native → China2 ; Native+China2 → Japan2 | <b>0.409 [0.402 ; 0.416]</b>   |       |

| <b>Prior set 2 - 30 generations/year</b> |                              |       |
|------------------------------------------|------------------------------|-------|
| Native → Japan1 ; Native → China1        | 0.112 [0.105 ; 0.119]        | 0.105 |
| Native → Japan1 → China1                 | <b>0.888 [0.881 ; 0.895]</b> |       |
| Native → Japan1 ; Native → China2        | <b>0.794 [0.784 ; 0.805]</b> | 0.089 |
| Native → Japan1 → China2                 | 0.206 [0.195 ; 0.216]        |       |
| Native → Japan2 ; Native → China2        | <b>0.380 [0.372 ; 0.388]</b> | 0.513 |
| Native → Japan2 → China2                 | 0.222 [0.216 ; 0.229]        |       |
| Native → China2 → Japan2                 | 0.104 [0.099 ; 0.110]        |       |
| Native → China2 ; Native+China2 → Japan2 | 0.294 [0.287 ; 0.301]        |       |

374 **Note:** PER stands for Posterior Error Rate. Native stands for the native area,  
 375 represented by the sample NE2. Japan1 stands for the Japanese genetic unit 1,  
 376 represented by the sample Kosa. Japan2 stands for the Japanese genetic unit 2,  
 377 represented by the sample Kasumig3. China1 stands for the Chinese genetic unit 1,  
 378 represented by the sample Laoshan. China 2 stands for the Chinese genetic unit 2,  
 379 represented by the sample Guangdong. See Results for details.

380  
 381  
 382 The analyses with all invaded areas studied here showed that an American origin for the  
 383 Portuguese populations appeared more likely than an Asian origin, this scenario obtaining the highest  
 384 posterior probability and this result being robust to prior set changes and generation time changes  
 385 (Table 3). The use of the 3 samples (NE5, NE9, NE22) from the native area genetically closest to NE2,  
 386 instead of NE2, gave mixed results and three analyses (out of six) pointed also towards an American  
 387 origin for the Portuguese populations (Table S3). Overall, there was a negative correlation between  
 388 the posterior probability of scenario 1 and the genetic distance between the sample used and NE2  
 389 [correlation coefficient of -0.46 (prior set 1) and -0.64 (prior set 2) for  $F_{ST}$ , and of -0.76 (prior set 1)  
 390 and -0.79 (prior set 2) for  $D_{EST}$ ]. We performed an independent ABC analysis with Japan2 and  
 391 Portugal. In this latter analysis, we selected once more an American origin for Portugal based on the  
 392 posterior probability (Table S4). We finally compared the final selected scenario (Scenario 1, Figure  
 393 1) to an “unique invasive bridgehead” scenario (Lombaert et al., 2010b), in which an unsampled  
 394 “ghost” invasive population, originating from the native area, was the source for Japan1 (being then  
 395 the source for China1), Japan2, China2 and Portugal. The scenario selected in the global analysis  
 396 (Scenario 1, Figure 1) obtained the highest posterior probability ( $p > 0.85$ ) whatever the prior set used  
 397 and thus appeared more likely than the “invasive bridgehead” scenario (Table S5).

398  
 399  
 400 **Table 3:** Results of the ABC analyses carried out to determine the origin of the pinewood nematode  
 401 invasion in Portugal. Posterior probabilities and their 95% confidence intervals (CI) were obtained  
 402 using a polychotomous logistic regression (J.-M. Cornuet, Ravigné, & Estoup, 2010; J.-M. Cornuet et  
 403 al., 2008) and the LDA option (J. M. Cornuet et al., 2014; Arnaud Estoup et al., 2012). The selected  
 404 scenario in each analysis is shown in bold.

| Analysis and scenario                                          | Posterior probability [95% CI] | PER   |
|----------------------------------------------------------------|--------------------------------|-------|
| <b>Prior set 1</b>                                             |                                |       |
| <b>30 generations/year</b>                                     |                                |       |
| Native → Japan1 → China1 ; Native → China2 ; Native → Portugal | <b>0.529 [0.509 ; 0.550]</b>   | 0.231 |
| Native → Japan1 → China1 ; Native → China2 → Portugal          | 0.013 [0.000 ; 0.040]          |       |
| Native → Japan1 → China1 and Portugal ; Native → China2        | 0.225 [0.203 ; 0.246]          |       |
| Native → Japan1 → China1 → Portugal ; Native → China2          | 0.233 [0.200 ; 0.266]          |       |
| <b>15 generations/year</b>                                     |                                |       |
| Native → Japan1 → China1 ; Native → China2 ; Native → Portugal | <b>0.574 [0.546 ; 0.603]</b>   | 0.235 |
| Native → Japan1 → China1 ; Native → China2 → Portugal          | 0.0210 [0.000 ; 0.067]         |       |
| Native → Japan1 → China1 and Portugal ; Native → China2        | 0.209 [0.174 ; 0.244]          |       |
| Native → Japan1 → China1 → Portugal ; Native → China2          | 0.196 [0.143 ; 0.250]          |       |
| <b>45 generations/year</b>                                     |                                |       |
| Native → Japan1 → China1 ; Native → China2 ; Native → Portugal | <b>0.497 [0.479 ; 0.514]</b>   | 0.248 |



|                                                                |                              |       |
|----------------------------------------------------------------|------------------------------|-------|
| Native → Japan1 → China1 ; Native → China2 → Portugal          | 0.021 [0.000 ; 0.044]        |       |
| Native → Japan1 → China1 and Portugal ; Native → China2        | 0.258 [0.241 ; 0.275]        |       |
| Native → Japan1 → China1 → Portugal ; Native → China2          | 0.224 [0.197 ; 0.252]        |       |
| <b>Prior set 2</b>                                             |                              |       |
| <b>30 generations/year</b>                                     |                              |       |
| Native → Japan1 → China1 ; Native → China2 ; Native → Portugal | <b>0.744 [0.716 ; 0.772]</b> |       |
| Native → Japan1 → China1 ; Native → China2 → Portugal          | 0.039 [0.000 ; 0.118]        | 0.158 |
| Native → Japan1 → China1 and Portugal ; Native → China2        | 0.049 [0.000 ; 0.131]        |       |
| Native → Japan1 → China1 → Portugal ; Native → China2          | 0.168 [0.079 ; 0.257]        |       |
| <b>15 generations/year</b>                                     |                              |       |
| Native → Japan1 → China1 ; Native → China2 ; Native → Portugal | <b>0.605 [0.568 ; 0.642]</b> |       |
| Native → Japan1 → China1 ; Native → China2 → Portugal          | 0.077 [0.023 ; 0.130]        | 0.134 |
| Native → Japan1 → China1 and Portugal ; Native → China2        | 0.123 [0.068 ; 0.178]        |       |
| Native → Japan1 → China1 → Portugal ; Native → China2          | 0.195 [0.123 ; 0.267]        |       |
| <b>45 generations/year</b>                                     |                              |       |
| Native → Japan1 → China1 ; Native → China2 ; Native → Portugal | <b>0.598 [0.569 ; 0.627]</b> |       |
| Native → Japan1 → China1 ; Native → China2 → Portugal          | 0.0372 [0.000 ; 0.078]       | 0.182 |
| Native → Japan1 → China1 and Portugal ; Native → China2        | 0.082 [0.042 ; 0.124]        |       |
| Native → Japan1 → China1 → Portugal ; Native → China2          | 0.282 [0.234 ; 0.330]        |       |

405 **Note:** PER stands for Posterior Error Rate. Native stands for the native area, represented by the  
 406 sample NE2. Japan1 stands for the Japanese genetic unit 1, represented by the sample Kosa. Japan2  
 407 stands for the Japanese genetic unit 2, represented by the sample Kasumig3. China1 stands for the  
 408 Chinese genetic unit 1, represented by the sample Laoshan. China 2 stands for the Chinese genetic  
 409 unit 2, represented by the sample Guangdong. Portugal stands for the Portuguese genetic unit,  
 410 represented by the sample TR1. See Results for details.

411  
 412  
 413 The posterior error rates appeared quite low for all the analyses (except the Japan2 – China2  
 414 analysis, Tables 2 and 3), demonstrating that the competing scenarios were actually distinguishable.  
 415 In addition, simulations from the selected scenarios and the posterior distributions of the parameters  
 416 were able to produce data close to the observed ones: none of the observed SuSts was in the extreme  
 417 5% tails of the distribution of simulated SuSts after correction (Table S6). Finally, the alternative  
 418 analyses performed using the ABC Random Forest algorithm confirmed all previous results involving  
 419 the main native sample NE2 (Table S7).

## 420 421 **DISCUSSION**

422  
 423 The main objective of this study was to infer the invasion routes of the PWN using the ABC method.  
 424 We demonstrated the existence of multiple independent introductions from the native area to Japan,  
 425 China and Europe. This inference has not been possible using descriptive population genetics  
 426 methods performed in a previous study (Mallez et al., 2015). Conversely, the ABC method helped  
 427 clarify the worldwide history of the PWN invasion even though the post-hoc analyses tempered the  
 428 conclusions, highlighting the importance of assessing the confidence in the results. The discrepancies  
 429 observed between descriptive genetic methods and the ABC method are worth investigating and are  
 430 discussed here.

### 431 432 *Invasion routes of the PWN and the origin of Portuguese populations*

433  
 434 Despite the low genetic diversity generally present in the PWN populations, we were able to reliably  
 435 select scenarios (among the ones compared) with high posterior probabilities and good quality  
 436 analyses in most cases. The most probable worldwide invasion history of the PWN identified in this  
 437 study (Figure 4) includes multiple introductions in Asia and an American origin of the European  
 438 samples.

439



440 **Figure 4: Worldwide invasion routes of the pinewood nematode as inferred from this study.** The  
441 year of first infestation for every invaded area is indicated in parenthesis.

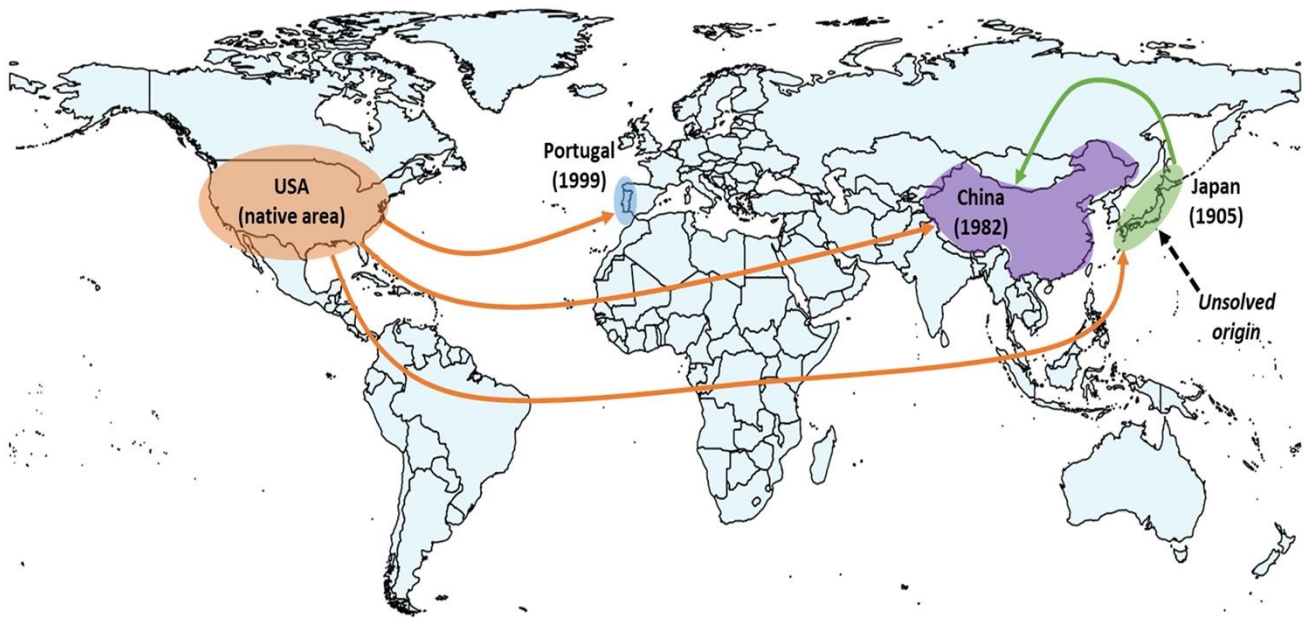

442  
443  
444 The analyses allowed us to reveal the existence of multiple independent events of  
445 introduction in China and Japan. Two events of introduction were inferred in both China (one from  
446 the USA and one from Japan) and Japan (one from the USA and one with an unknown origin).  
447 Especially, these results strengthen the hypothesis of two events of introduction in China, the first  
448 one near Nanjing in 1982 and the second one near Hong-Kong in 1988, already suggested by modeling  
449 approaches in Robinet et al (2009; but see Cheng, Cheng, Xu, & Xie, 2008). Concerning Europe, the  
450 main ABC analyses of the PWN microsatellites data designated the USA as the most probable source  
451 of the Portuguese populations and excluded Japan and China as possible sources, contrary to what is  
452 often presented in the literature based on genetic distance trees (Figueiredo et al., 2013; Fonseca et  
453 al., 2012; Metge & Burgermeister, 2008; Valadas et al., 2012; Valadas, Laranjo, Mota, & Oliveira, 2013;  
454 Vieira, Burgermeister, Mota, Metge, & Silva, 2007). This result was quite robust to changes in the  
455 parameters' priors and to the posterior model checking analyses, but it depended on the samples  
456 considered in the native area, which may be considered a problem. Interestingly, our results displayed  
457 a pattern similar to the one obtained by Guillemaud *et al.* (2010). These authors found a negative  
458 correlation between the genetic distance of the samples considered to the most probable source and  
459 the probability of an independent scenario when this scenario was true. In other words, when two  
460 invasive populations originate from two independent introductions from a native population, the  
461 more distant is the native sample from the true source, the more probable it is to erroneously point  
462 to a scenario with two serial introductions. Therefore the "mixed" results obtained by changing the  
463 sample of the native area are expected if the true scenario includes an American origin of the  
464 European samples. Overall, the ABC method allowed us to clarify the history of the PWN invasion in  
465 Europe with good statistical confidence.

466 This study highlights the central role of the native area in the worldwide history of invasion of  
467 the PWN, adding up three as the minimum number of independent introductions from the USA. Only  
468 one detectable event of introduction seems to have occurred in Portugal. Considering the volume of  
469 global trade between Portugal and the worldwide infested areas, this result shows that quarantine  
470 and inspection efforts have been globally successful and efficient to date to minimize the number of  
471 independent outbreaks and confirms the importance of prevention and pro-active actions to limit  
472 new introductions (Simberloff & Rejmanek, 2011). At the European level, ecological and pedo-climatic

473 conditions favorable to the PWN are encountered in many countries (Robinet, Van Opstal, Baker, &  
474 Roques, 2011). However, the invasion is currently limited to the Iberian Peninsula (plus Madeira  
475 Island). This reinforces the idea that the quarantine regulation measures have been efficient to date  
476 to protect Europe from the entry of new invasive PWN populations from abroad, and from a large  
477 dissemination of the PWN from the original Portuguese outbreak.

478

#### 479 *Different methods with different results*

480

481 In the case of the PWN invasion, the results obtained from descriptive genetic approaches pointed  
482 out different putative origins for the European populations of PWN (Mallez et al., 2015): American  
483 based on  $F_{ST}$  values (Weir & Cockerham, 1984) and mean individual assignment likelihoods (Paetkau  
484 et al., 2004), and Japanese based on Cavalli-Sforza and Edwards' distances (Cavalli-Sforza & Edwards,  
485 1967) and Bayesian clustering (Pritchard et al., 2000). The ABC analyses, quantitative and probability-  
486 based, allowed us to improve greatly the history of the PWN invasion. Our study highlights  
487 discrepancies between the ABC methodology and some of the descriptive approaches, namely the  
488 Bayesian clustering of individuals (Pritchard et al., 2000) and distance genetic trees (Saitou & Nei,  
489 1987). To our knowledge, such discrepancies have not been observed yet, although a simulation study  
490 showed that classic clustering methods such as Structure analyses (Pritchard et al., 2000) may be  
491 erroneously interpreted in the context of invasion route inference (Lombaert, Guillemaud, & Deleury,  
492 2018). The origin of the discrepancies we observed is not completely clear to us, but hypotheses may  
493 be proposed.

494 They may have arisen from the very low level of genetic diversity observed in the PWN  
495 populations, which might disturb the analyses of the descriptive genetic methods and thus their  
496 outcomes. In an invasion context, a low genetic diversity is usually the translation of strong founder  
497 effects, which implies a strong genetic drift. Genetic drift, in turn, is a stochastic process whose  
498 consequences are random. Employing methods such as ABC that take these stochastic effects into  
499 account may thus be more reliable than other methods that do not, such as Bayesian clustering or  
500 distance-based methods (Guillemaud et al., 2010). In these conditions of low genetic diversity, we  
501 can expect descriptive methods to lead to variable results when applied to various realizations of the  
502 same historical scenario. We may expect the low level of genetic diversity to produce a genetic  
503 structure pattern and/or relationship between site samples that we misinterpret (as in Lombaert et  
504 al., 2018). For instance, if the native area is weakly diversified so that it exhibits a few very frequent  
505 alleles, it is probable that two independent introductions from this native area (native  $\rightarrow$  invasive 1  
506 and native  $\rightarrow$  invasive 2) lead to samples closer to each other than to their native area. When  
507 analyzed, such results would suggest serial introductions (native  $\rightarrow$  invasive 1  $\rightarrow$  invasive 2, because  
508 invasive1 and 2 are closer to each other than to native) instead of the true independent introduction  
509 scenario, because the interpretation is binary and not based on probability computation. Using a  
510 model-based stochastic method, such as ABC, a genetic structure with invading samples closer to  
511 each other than to the native area may lead to the choice of independent introduction scenario  
512 because it is probable to get such structure with this scenario when the diversity is low.

513 The observed discrepancies may thus just be the consequence of the absence of statistical  
514 support associated with descriptive genetic methods permitting to quantitatively base the choice of  
515 evolutionary scenarios (criticism presented in Estoup & Guillemaud, 2010).

516 Carrying out simulations may help to disentangle the effect of the genetic diversity in the  
517 native area on the outcomes of clustering methods and ABC analyses, a work partly performed by  
518 Lombaert *et al.* (2018) who did not use ABC analyses. More precisely, analyzing datasets, simulated  
519 under chosen scenarios and known levels of genetic diversity, may allow to assess the behavior of  
520 these analyses in relation to the level of genetic diversity. These simulations would thus be useful to  
521 (i) determine the real impact of the genetic diversity on the outcomes and (ii) verify that the  
522 interpretations made from these methods in the biological invasion framework are appropriate.

523

524

## 525 **ACKNOWLEDGEMENTS**

526 We would like to thank Pedro Barbosa, Douglas LeDoux, Julia Thompson, Margarida Espada, Paulo  
527 Vieira, Jonathan D. Eisenback, Mark Harrell, Manuel Mota, Takuya Aikawa, Mitsuteru Akiba, Hajime  
528 Kosaka, Lilin Zhao and Jianghua Sun for technical support, precious help in sampling and fruitful  
529 discussions. This work was funded by the EU REPHRAME project (KBBE.2010.1.4-09).

530

## 531 **DATA ACCESSIBILITY STATEMENT**

532 Complete dataset (microsatellite), STRUCTURE outputs and ABC configuration files were deposited at  
533 Zenodo: [10.5281/zenodo.4019342](https://doi.org/10.5281/zenodo.4019342)

534

## 535 **AUTHOR CONTRIBUTIONS**

536 SM and CC performed microsatellite genotyping. SM performed the analyses, with input from EL. SM,  
537 EL, PCS and TG interpreted the results. SM wrote the manuscript, with guidance from PCS and TG,  
538 and input from EL. All authors have read and approved the final manuscript.

539

## 540 **CONFLICT OF INTEREST DISCLOSURE**

541 The authors of this article declare that they have no financial conflict of interest with the content of  
542 this article. TG is co-founder of PCI and TG and EL are recommenders for PCI Evol Biol, PCI Ecol and  
543 PCI Zool.

544

545

## 546 **REFERENCES**

- 547 Abelleira, A., Picoaga, A., Mansilla, J. P., & Aguin, O. (2011). Detection of *Bursaphelenchus xylophilus*,  
548 causal agent of pine wilt disease on *Pinus pinaster* in Northwestern Spain. *Plant Disease*, *95*(6),  
549 776.
- 550 Ascunce, M. S., Yang, C. C., Oakey, J., Calcaterra, L., Wu, W. J., Shih, C. J., Shoemaker, D. (2011). Global  
551 Invasion History of the Fire Ant *Solenopsis invicta*. *Science*, *331*(6020), 1066-1068.  
552 doi:10.1126/science.1198734
- 553 Barres, B., Carlier, J., Seguin, M., Fenouillet, C., Cilas, C., & Ravigne, V. (2012). Understanding the  
554 recent colonization history of a plant pathogenic fungus using population genetic tools and  
555 Approximate Bayesian Computation. *Heredity*, *109*(5), 269-279. doi:10.1038/hdy.2012.37
- 556 Beaumont, M. A., Zhang, W. Y., & Balding, D. J. (2002). Approximate Bayesian computation in  
557 population genetics. *Genetics*, *162*(4), 2025-2035.
- 558 Belkhir, K., Borsa, P., Chikhi, L., Raufaste, N., & Bonhomme, F. (1996-2004). GENETIX 4.05, logiciel  
559 sous Windows TM pour la génétique des populations. Laboratoire Génome, Populations,  
560 Interactions, CNRS UMR 5000, Université de Montpellier Montpellier (France).
- 561 Benjamini, Y., & Hochberg, Y. (1995). Controlling the false discovery rate - a practical and powerful  
562 approach to multiple testing. *Journal of the Royal Statistical Society Series B-Methodological*,  
563 *57*(1), 289-300.
- 564 Boissin, E., Hurley, B., Wingfield, M. J., Vasaitis, R., Stenlid, J., Davis, C., . . . Slippers, B. (2012).  
565 Retracing the routes of introduction of invasive species: the case of the Sirex noctilio  
566 woodwasp. *Molecular Ecology*, *21*(23), 5728-5744. doi:10.1111/mec.12065
- 567 Boucher, A. C., Mimee, B., Montarry, J., Bardou-Valette, S., Belair, G., Moffett, P., & Grenier, E. (2013).  
568 Genetic diversity of the golden potato cyst nematode *Globodera rostochiensis* and  
569 determination of the origin of populations in Quebec, Canada. *Molecular Phylogenetics and*  
570 *Evolution*, *69*(1), 75-82. doi:10.1016/j.ympev.2013.05.020
- 571 Breiman, L. (2001). Random forests. *Machine Learning*, *45*(1), 5-32. doi:10.1023/A:1010933404324
- 572 Castagnone, C., Abad, P., & Castagnone-Sereno, P. (2005). Satellite DNA-based species-specific  
573 identification of single individuals of the pinewood nematode *Bursaphelenchus xylophilus*

- 574 (Nematoda : Aphelenchoididae). *European Journal of Plant Pathology*, 112(2), 191-193.  
575 doi:10.1007/s10658-004-0580-2
- 576 Cavalli-Sforza, L. L., & Edwards, A. W. F. (1967). Phylogenetic analysis. Models and estimation  
577 procedures. *The American Journal of Humans Genetics*, 19, 233 - 257.
- 578 Chakraborty, R., & Jin, L. (1993). A unified approach to study hypervariable polymorphisms: statistical  
579 considerations of determining relatedness and population distances. *EXS*, 67, 153-175.
- 580 Chapuis, M.-P., & Estoup, A. (2007). Microsatellite null alleles and estimation of population  
581 differentiation. *Molecular Biology and Evolution*, 24(3), 621-631. doi:10.1093/molbev/msl191
- 582 Cheng, X. Y., Cheng, F. X., Xu, R. M., & Xie, B. Y. (2008). Genetic variation in the invasive process of  
583 *Bursaphelenchus xylophilus* (Aphelenchida: Aphelenchoididae) and its possible spread routes  
584 in China. *Heredity*, 100(4), 356-365. doi:10.1038/sj.hdy.6801082
- 585 Choisy, M., Franck, P., & Cornuet, J. M. (2004). Estimating admixture proportions with microsatellites:  
586 comparison of methods based on simulated data. *Molecular Ecology*, 13(4), 955–968.  
587 doi:10.1111/j.1365-294X.2004.02107.x
- 588 Ciosi, M., Miller, N. J., Kim, K. S., Giordano, R., Estoup, A., & Guillemaud, T. (2008). Invasion of Europe  
589 by the western corn rootworm, *Diabrotica virgifera virgifera*: multiple transatlantic  
590 introductions with various reductions of genetic diversity. *Molecular Ecology*, 17(16), 3614-  
591 3627.
- 592 Collin, F.-D., Durif, G., Raynal, L., Lombaert, E., Gautier, M., Vitalis, R., ... Estoup, A. (2020) Extending  
593 Approximate Bayesian Computation with Supervised Machine Learning to infer demographic  
594 history from genetic polymorphisms using DIYABC Random Forest. Manuscript submitted for  
595 publication.
- 596 Cornuet, J.-M., Santos, F., Beaumont, M. A., Robert, C. P., Marin, J.-M., Balding, D. J., . . . Estoup, A.  
597 (2008). Inferring population history with DIY ABC: a user-friendly approach to approximate  
598 Bayesian computation. *Bioinformatics*, 24(23), 2713-2719.  
599 doi:10.1093/bioinformatics/btn514
- 600 Cornuet, J. M., Pudlo, P., Veyssier, J., Dehne-Garcia, A., Gautier, M., Leblois, R., . . . Estoup, A. (2014).  
601 DIYABC v2.0: a software to make approximate Bayesian computation inferences about  
602 population history using single nucleotide polymorphism, DNA sequence and microsatellite  
603 data. *Bioinformatics*, 30(8), 1187-1189. doi:10.1093/bioinformatics/btt763
- 604 Cornuet, J. M., Ravigne, V., & Estoup, A. (2010). Inference on population history and model checking  
605 using DNA sequence and microsatellite data with the software DIYABC (v1.0). *Bmc*  
606 *Bioinformatics*, 11. doi:10.1186/1471-2105-11-401
- 607 Crawford, N. G. (2010). SMOGD: software for the measurement of genetic diversity. *Molecular*  
608 *Ecology Resources*, 10(3), 556-557. doi:10.1111/j.1755-0998.2009.02801.x
- 609 Dropkin, V. H., Foudin, A., Kondo, E., Linit, M. J., Smith, M., & Robbins, K. (1981). Pinewood nematode  
610 : a threat to US forests? *Plant Disease*, 65(12), 1022 - 1027.
- 611 Estoup, A., & Guillemaud, T. (2010). Reconstructing routes of invasion using genetic data: why, how  
612 and so what? *Molecular Ecology*, 19(19), 4113-4130. doi:10.1111/j.1365-294X.2010.04773.x
- 613 Estoup, A., Lombaert, E., Marin, J.-M., Guillemaud, T., Pudlo, P., Robert, C. P., & Cornuet, J.-M. (2012).  
614 Estimation of demo-genetic model probabilities with Approximate Bayesian Computation  
615 using linear discriminant analysis on summary statistics. *Molecular Ecology Resources*, 12(5),  
616 846-855. doi:10.1111/j.1755-0998.2012.03153.x
- 617 Evanno, G., Regnaut, S., & Goudet, J. (2005). - Detecting the number of clusters of individuals using  
618 the software structure: a simulation study. - 14(- 8), - 2620.
- 619 Facon, B., Pointier, J. P., Glaubrecht, M., Poux, C., Jarne, P., & David, P. (2003). A molecular  
620 phylogeography approach to biological invasions of the New World by parthenogenetic  
621 Thiarid snails. *Molecular Ecology*, 12(11), 3027-3039. doi:10.1046/j.1365-294X.2003.01972.x
- 622 Figueiredo, J., Simões, M. J., Gomes, P., Barroso, C., Pinho, D., Conceição, L., . . . Egas, C. (2013).  
623 Assessment of the Geographic Origins of Pinewood Nematode Isolates via Single Nucleotide  
624 Polymorphism in Effector Genes. *Plos One*, 8(12), e83542. doi:10.1371/journal.pone.0083542



- 625 Fonseca, L., Cardoso, J. M. S., Lopes, A., Pestana, M., Abreu, F., Nunes, N., . . . Abrantes, I. (2012). The  
626 pinewood nematode, *Bursaphelenchus xylophilus*, in Madeira Island. *Helminthologia*, 49(2),  
627 96 - 103.
- 628 Fontaine, M. C., Gladioux, P., Hood, M. E., & Giraud, T. (2013). History of the invasion of the anther  
629 smut pathogen on *Silene latifolia* in North America. *New Phytologist*, 198(3), 946-956.  
630 doi:10.1111/nph.12177
- 631 Fraimout, A., Debat, V., Fellous, S., Hufbauer, R. A., Foucaud, J., Pudlo, P., ... Estoup, A. (2017).  
632 Deciphering the Routes of invasion of *Drosophila suzukii* by Means of ABC Random Forest.  
633 *Molecular Biology and Evolution*, 34(4), 980–996. doi:10.1093/molbev/msx050
- 634 Futai, K. (2013). Pinewood nematode, *Bursaphelenchus xylophilus*. *Annual Review of Phytopathology*,  
635 51, 61-83.
- 636 Garza, J. C., & Williamson, E. G. (2001). Detection of reduction in population size using data from  
637 microsatellite loci. *Molecular Ecology*, 10(2), 305-318. doi:10.1046/j.1365-294X.2001.01190.x
- 638 Goldstein, D. B., Linares, A. R., Cavalli-sforza, L. L., & Feldman, M. W. (1995). An evaluation of genetic  
639 distances for use with microsatellite loci. *Genetics*, 139(1), 463-471.
- 640 Goudet, J. (2002). Fstat, a program to estimate and test gene diversities and fixation indices. Retrieved  
641 from <http://www2.unil.ch/popgen/softwares/fstat.htm>
- 642 Guillemaud, T., Beaumont, M. A., Ciosi, M., Cornuet, J.-M., & Estoup, A. (2010). Inferring introduction  
643 routes of invasive species using approximate Bayesian computation on microsatellite data.  
644 *Heredity*, 104(1), 88 - 99. doi:doi:10.1038/hdy.2009.92
- 645 Guillemaud, T., Blin, A., Le Goff, I., Desneux, N., Reyes, M., Tabone, E., . . . Lombaert, E. (2015). The  
646 tomato borer, *Tuta absoluta*, invading the Mediterranean Basin, originates from a single  
647 introduction from Central Chile. *Scientific Reports*, 5, 8371. doi:10.1038/srep08371
- 648 Jakobsson, M., & Rosenberg, N. A. (2007). CLUMPP: a cluster matching and permutation program for  
649 dealing with label switching and multimodality in analysis of population structure.  
650 *Bioinformatics*, 23(14), 1801 - 1806.
- 651 Jost, L. (2008). G(ST) and its relatives do not measure differentiation. *Molecular Ecology*, 17(18), 4015-  
652 4026. doi:10.1111/j.1365-294X.2008.03887.x
- 653 Kelager, A., Pedersen, J., & Bruun, H. (2013). Multiple introductions and no loss of genetic diversity:  
654 invasion history of Japanese Rose, *Rosa rugosa*, in Europe. *Biological Invasions*, 15(5), 1125-  
655 1141. doi:10.1007/s10530-012-0356-0
- 656 Kiritani, K., & Morimoto, N. (2004). Invasive insect and nematode pests from North America *Global*  
657 *Environmental Research*, 8(1), 75 - 88.
- 658 Kopelman, N. M., Mayzel, J., Jakobsson, M., Rosenberg, N. A., & Mayrose, I. (2015). - Clumpak: a  
659 program for identifying clustering modes and packaging population structure inferences  
660 across K. - 15(- 5), - 1191.
- 661 Lombaert, E., Guillemaud, T., Cornuet, J. M., Malausa, T., Facon, B., & Estoup, A. (2010a). Bridgehead  
662 Effect in the Worldwide Invasion of the Biocontrol Harlequin Ladybird. *Plos One*, 5(3).  
663 doi:e974310.1371/journal.pone.0009743
- 664 Lombaert, E., Guillemaud, T., Cornuet, J. M., Malausa, T., Facon, B., & Estoup, A. (2010b). Bridgehead  
665 Effect in the Worldwide Invasion of the Biocontrol Harlequin Ladybird. *Plos One*, 5(3), e9743.  
666 doi:10.1371/journal.pone.0009743
- 667 Lombaert, E., Guillemaud, T., & Deleury, E. (2018). Biases of STRUCTURE software when exploring  
668 introduction routes of invasive species. *Heredity*, 120(6), 485 - 499. doi:doi:10.1038/s41437-  
669 017-0042-1
- 670 Lombaert, E., Guillemaud, T., Lundgren, J., Koch, R., Facon, B., Grez, A., Estoup, A. (2014).  
671 Complementarity of statistical treatments to reconstruct worldwide routes of invasion: the  
672 case of the Asian ladybird *Harmonia axyridis*. *Molecular Ecology*, 23, 5979 - 5997.
- 673 Mack, R. N., Simberloff, D., Mark Lonsdale, W., Evans, H., Clout, M., & Bazzaz, F. A. (2000). Biotic  
674 invasions : Causes, Epidemiology, Global Consequences, and control. *Ecological Applications*,  
675 10(3), 689-710.



- 676 Mallez, S., Castagnone, C., Espada, M., Vieira, P., Eisenback, J. D., Harrell, M., Guillemaud, T. (2015).  
677 Worldwide invasion routes of the pinewood nematode: What can we infer from population  
678 genetics analyses? *Biological Invasions*, 17(4), 1199 - 1213. doi:10.1007/s10530-014-0788-9
- 679 Mallez, S., Castagnone, C., Espada, M., Vieira, P., Eisenback, J. D., Mota, M., Castagnone-Sereno, P.  
680 (2013). First insights into the genetic diversity of the pinewood nematode in its native area  
681 using new polymorphic microsatellite loci. *Plos One*, 8(3), e59165.  
682 doi:10.1371/journal.pone.0059165
- 683 Mamiya, Y. (1972). Pine wood nematode *Bursaphelenchus lignicolus* Mamiya and Kiyohara, as a  
684 causal agent of pine wilting disease. *Review of Plant Protection Research*, 5, 46 - 60.
- 685 Mamiya, Y. (1976). Pine wilt disease caused by the pine wood nematode, *Bursaphelenchus lignicolus*,  
686 in Japan. *Japan Agricultural Research Quarterly*, 10(4), 206 - 211.
- 687 Mamiya, Y. (1983). Pathology of the pine wilt disease caused by *Bursaphelenchus xylophilus*. *Annual*  
688 *Review of Phytopathology*, 21, 201-220. doi:10.1146/annurev.py.21.090183.001221
- 689 Mamiya, Y. (1988). History of pine wilt disease in Japan. *Journal of Nematology*, 20(2), 219 - 226.
- 690 Metge, K., & Burgermeister, W. (2008). Analysis of *Bursaphelenchus xylophilus* (Nematoda:  
691 Parasitaphelenchidae) provenances using ISSR and RAPD fingerprints. In M. Mota & P. Vieira  
692 (Eds.), *Pine wilt disease: a worldwide threat to forest ecosystems* (pp. 175-186).
- 693 Miller, N., Estoup, A., Toepfer, S., Bourguet, D., Lapchin, L., Derridj, S., Guillemaud, T. (2005). Multiple  
694 transatlantic introductions of the western corn rootworm. *Science*, 310(5750), 992-992.  
695 doi:10.1126/science.1115871
- 696 Moon, Y. S., Cheon, H. M., & Lee, S. (2007). Occurrence of pine wilt disease, caused by *Bursaphelenchus*  
697 *xylophilus*, from *Pinus koraiensis* in Korea. *Journal of Nematology*, 39(1), 87 - 88.
- 698 Mooney, H. A., & Cleland, E. E. (2001). The evolutionary impact of invasive species. *Proceedings of*  
699 *the National Academy of Sciences of the United States of America*, 98(10), 5446-5451.  
700 doi:10.1073/pnas.091093398
- 701 Mota, M., Braasch, H., Bravo, M. A., Penas, A. C., Burgermeister, W., Metge, K., & Sousa, E. (1999).  
702 First report of *Bursaphelenchus xylophilus* in Portugal and in Europe. *Nematology*, 1(7 - 8), 727  
703 - 734.
- 704 Paetkau, D., Slade, R., Burden, M., & Estoup, A. (2004). Genetic assignment methods for the direct,  
705 real-time estimation of migration rate: a simulation-based exploration of accuracy and power.  
706 *Molecular Ecology*, 13(1), 55 - 65. doi:10.1046/j.1365-294X.2004.02008.x
- 707 Papura, D., Burban, C., van Helden, M., Giresse, X., Nusillard, B., Guillemaud, T., & Kerdelhué, C.  
708 (2012). Microsatellite and Mitochondrial Data Provide Evidence for a Single Major  
709 Introduction for the Nearctic Leafhopper *Scaphoideus titanus* in Europe. *Plos One*, 7(5),  
710 e36882. doi:10.1371/journal.pone.0036882
- 711 Pascual, M., Chapuis, M. P., Mestres, F., Balanya, J., Huey, R. B., Gilchrist, G. W., Estoup, A. (2007).  
712 Introduction history of *Drosophila subobscura* in the New World: a microsatellite-based  
713 survey using ABC methods. *Molecular Ecology*, 16, 3069 - 3083.
- 714 Perdereau, E., Bagnères, A. G., Bankhead-Dronnet, S., Dupont, S., Zimmermann, M., Vargo, E. L., &  
715 Dedeine, F. (2013). Global genetic analysis reveals the putative native source of the invasive  
716 termite, *Reticulitermes flavipes*, in France. *Molecular Ecology*, 22(4), 1105-1119.  
717 doi:10.1111/mec.12140
- 718 Piry, S., Alapetite, A., Cornuet, J.-M., Paetkau, D., Baudouin, L., & Estoup, A. (2004). GENECLASS2: A  
719 Software for Genetic Assignment and First-Generation Migrant Detection. *Journal of Heredity*,  
720 95(6), 536-539. doi:10.1093/jhered/esh074
- 721 Pritchard, J. K., Stephens, M., & Donnelly, P. (2000). Inference of population structure using multilocus  
722 genotype data. *Genetics*, 155(2), 945-959.
- 723 Pudlo, P., Marin, J. M., Estoup, A., Cornuet, J. M., Gautier, M., & Robert, C. P. (2016). Reliable ABC  
724 model choice via random forests. *Bioinformatics*, 32(6), 859-866.  
725 doi:10.1093/bioinformatics/btv684

- 726 Ricciardi, A. (2007). Are modern biological invasions an unprecedented form of global change?  
727 *Conservation Biology*, 21(2), 329-336. doi:10.1111/j.1523-1739.2006.00615.x
- 728 Rius, M., Turon, X., Ordonez, V., & Pascual, M. (2012). Tracking Invasion Histories in the Sea: Facing  
729 Complex Scenarios Using Multilocus Data. *Plos One*, 7(4). doi:10.1371/journal.pone.0035815
- 730 Robinet, C., Roques, A., Pan, H. Y., Fang, G. F., Ye, J. R., Zhang, Y. Z., & Sun, J. H. (2009). Role of human-  
731 mediated dispersal in the spread of the pinewood nematode in China. *Plos One*, 4(2).  
732 doi:e464610.1371/journal.pone.0004646
- 733 Robinet, C., Van Opstal, N., Baker, R., & Roques, A. (2011). Applying a spread model to identify the  
734 entry points from which the pine wood nematode, the vector of pine wilt disease, would  
735 spread most rapidly across Europe. *Biological Invasions*, 13(12), 2981-2995.  
736 doi:10.1007/s10530-011-9983-0
- 737 Rollins, L. A., Woolnough, A. P., Wilton, A. N., Sinclair, R. O. N., & Sherwin, W. B. (2009). Invasive  
738 species can't cover their tracks: using microsatellites to assist management of starling (*Sturnus*  
739 *vulgaris*) populations in Western Australia. *Molecular Ecology*, 18(8), 1560-1573.  
740 doi:10.1111/j.1365-294X.2009.04132.x
- 741 Rosenberg, N. A. (2004). DISTRUCT: a program for the graphical display of population structure.  
742 *Molecular Ecology Notes*, 4(1), 137-138. doi:10.1046/j.1471-8286.2003.00566.x
- 743 Rousset, F. (2008). GENEPOP '007: a complete re-implementation of the GENEPOP software for  
744 Windows and Linux. *Molecular Ecology Resources*, 8(1), 103-106. doi:10.1111/j.1471-  
745 8286.2007.01931.x
- 746 Saitou, N., & Nei, M. (1987). The neighbor-joining method: a new method for reconstructing  
747 phylogenetic trees. *Molecular Biology and Evolution*, 4(4), 406-425.
- 748 Sala, O. E., Chapin, F. S., Armesto, J. J., Berlow, E., Bloomfield, J., Dirzo, R., . . . Wall, D. H. (2000).  
749 Biodiversity - Global biodiversity scenarios for the year 2100. *Science*, 287(5459), 1770-1774.  
750 doi:10.1126/science.287.5459.1770
- 751 Sherpa, S., Blum, M. G. B., Capblancq, T., Cumer, T., Rioux, D., & Després, L. (2019). Unravelling the  
752 invasion history of the Asian tiger mosquito in Europe. *Molecular Ecology*, 28(9), 2360–2377.  
753 doi:10.1111/mec.15071
- 754 Simberloff, D. (2009). We can eliminate invasions or live with them. Successful management projects.  
755 *Biological Invasions*, 11(1), 149-157. doi:10.1007/s10530-008-9317-z
- 756 Simberloff, D., & Rejmanek, M. (2011). *Encyclopedia of Biological Invasions*. In U. o. C. Press (Ed.).
- 757 Sokal, R. R., & Rohlf, F. J. (1995). *Biometry. The principles and practice of statistics in biological*  
758 *research*. (N. Y. W. H. Freeman and Compagny Ed. Third Edition ed.).
- 759 Soliman, T., Mourits, M. C. M., van der Werf, W., Hengeveld, G. M., Robinet, C., & Lansink, A. (2012).  
760 Framework for modelling economic impacts of invasive species, applied to pine wood  
761 nematode in Europe. *Plos One*, 7(9). doi:10.1371/journal.pone.0045505
- 762 Steiner, G., & Buhner, E. M. (1934). *Aphelenchoides xylophilus*, N. SP. A nematode associated with  
763 blue-stain and other fungi in timber. *Journal of agricultural research*, 48(10), 949 - 951.
- 764 Suzuki, K. (2002). Pine wilt disease - a threat to pine forest in Europe. *Dendrobiology*, 48, 71 - 74.
- 765 Valadas, V., Barbosa, P., Espada, M., Oliveira, S., & Mota, M. (2012). The pinewood nematode,  
766 *Bursaphelenchus xylophilus*, in Portugal : possible introductions and spread routes of a serious  
767 biological invasion revealed by molecular methods. *Nematology*, 14(8), 899 - 911.
- 768 Valadas, V., Laranjo, M., Mota, M., & Oliveira, S. (2013). Molecular characterization of Portuguese  
769 populations of the pinewood nematode *Bursaphelenchus xylophilus* using cytochrome b and  
770 cellulase genes. *Journal of Helminthology*, 87(4), 457 - 466.
- 771 Vicente, C., Espada, M., Vieira, P., & Mota, M. (2011). Pine Wilt Disease : a threat to European forestry.  
772 *European Journal of Plant Pathology*, 133, 89 - 99.
- 773 Vieira, P., Burgermeister, W., Mota, M., Metge, K., & Silva, G. (2007). Lack of genetic variation of  
774 *Bursaphelenchus xylophilus* in Portugal revealed by RAPD-PCR analyses. *Journal of*  
775 *Nematology*, 39(2), 118-126.

- 776 Viglierchio, D. R., & Schmitt, R. V. (1983). On the methodology of nematode extraction from field  
777 samples : Baermann funnel modifications. *Journal of Nematology*, 15(3), 438 - 444.
- 778 Vitousek, P. M., Dantonio, C. M., Loope, L. L., & Westbrooks, R. (1996). Biological invasions as global  
779 environmental change. *American Scientist*, 84(5), 468-478.
- 780 Walker, B. H., & Steffen, W. (1997). An overview of the implications of global change for natural and  
781 managed terrestrial ecosystems. *Conservation Ecology [online]*. Retrieved from  
782 <http://www.consecol.org/vol1/iss2/art2/>
- 783 Wan, X. W., Liu, Y. H., & Zhang, B. (2012). Invasion History of the Oriental Fruit Fly, *Bactrocera dorsalis*,  
784 in the Pacific-Asia Region: Two Main Invasion Routes. *Plos One*, 7(5).  
785 doi:10.1371/journal.pone.0036176
- 786 Weir, B. S., & Cockerham, C. C. (1984). Estimating F-Statistics for the analysis of population structure.  
787 *Evolution*, 38(6), 1358-1370.
- 788 Wilcove, D. S., Rothstein, D., Dubow, J., Phillips, A., & Losos, E. (1998). Quantifying threats to imperiled  
789 species in the United States. *BioScience*, 48(8), 607-615. doi:10.2307/1313420
